# Supplementary material for: Evaluation of ACCMIP ozone simulations using a multi-constituentchemical reanalysis
Source: Copernicus journal article supplement (doi:10.5194/acp-2016-1043), 2016-12-23
Supplement: Supplementary file [file acp-2016-1043-AC1-supplement.pdf]

**Authors' comments in reply to the anonymous referee for "Evaluation of ACCMIP ozone simulations using a multi-constituent chemical reanalysis" by K. Miyazaki and K. Bowman**

We want to thank the referee for the helpful comments. We have revised the manuscript according to the comments, and hope that the revised version is now suitable for publication. Below are the referee comments in italics, with our replies in normal font.

***Reply to Referee #1***

*General remarks:*

*The paper would benefit from a more stringent focus on the ozone sonde sampling biases and its impact on the evaluation because this is the actual novelty aspect of the paper. The ACCMIP models have been evaluated. So only the differences of the new evaluation approach with previous work is of interest. I would recommend to add to the title "- focus on ozone sonde sampling biases" or similar. The sampling biases should be mentioned and discussed in abstract and introduction more clearly.*

The title has been revised as follows:

"Evaluation of ACCMIP ozone simulations and ozonesonde sampling biases using a satellite-based multi-constituent chemical reanalysis."

The abstract and introduction have been modified to mention the sampling biases.

*To get a better understanding of the sampling biases, i.e. the difference in the mean over area averages using all grid points at regular intervals or only the stations locations at the time of the observations, it is recommended to show the sampling biases not only for the differences between ACCMIP models and the reanalysis but also for the Re-analysis and the model runs, including the control run itself. It would be interesting to see to what extent they differ as the reanalysis may also be effected by the "sampling biases" of the assimilated observations. A strong sampling biases for model result will help to convince modellers to use reanalysis data for model evaluation.*

Table 9 has been added to discuss the impacts of the sampling biases in the reanalysis and control run comparisons. These results are discussed in Section 5.1 as follows:

"Further, ozonesonde sampling bias is evaluated for the control run and reanalysis comparisons. As summarized in Table 9, at 500 hPa, there are large differences (> 30 %) between the two evaluations in

many regions, especially in the NH mid latitude regions in winter and in the tropics throughout the year, as also found in the ACCMIP models and reanalysis comparisons (Table 8). The analysis increments introduced by data assimilation vary with space and time, reflecting the changes in coverage and uncertainty of assimilated measurements as well as in model errors. Nevertheless, observational information was propagated globally and integrated with time through forecast steps during the data assimilation cycles. This is true for ozone because of its relatively long lifetime in the free troposphere. Therefore, the spatial distribution is well constrained by data assimilation, and we do not expect large variations in the reanalysis quality within each analysis region.”

*The authors should aim to provide a better understanding of the reasons of the sampling biases. Do they come more from spatial heterogeneity or the variable temporal sampling. The latter can be estimated by comparing re-analysis means at a 2 hourly resolution or only at the ozone sonde observing times. For the sake of consistency the quantification of the sampling biases should be carried out for one set of latitude bands in the same way as in the more regional analysis presented in section 5.*

Table 8 has been revised to discuss the influences of temporal and spatial sampling errors separately. The following sentences have been added in Section 5.1:

“Our analysis using monthly reanalysis fields sampled at the ozonesonde locations (brackets in Table 8) suggests a greater impact of the spatial sampling bias than the temporal sampling bias for the NH polar east in DJF.”

“At 500 hPa over Canada, the relative importance of the spatial and temporal sampling biases varies with season: the spatial (temporal) sampling bias is dominant in DJF (JJA), whereas both of them are important in MAM.”

“Over the Western Pacific and East Indian Ocean, the sampling bias is not reduced by using monthly mean reanalysis fields (sampled at the ozonesonde locations) in DJF and JJA. This suggests that ozone varies with time and space in a complex manner, and a dense (in both space and time) network would be required to capture the regional and seasonally representative model biases in this region.”

“The temporal sampling bias mostly dominates the difference in the SH high latitudes in MAM and JJA, whereas the spatial sampling bias is also important in the SH mid latitudes in DJF and MAM.”

Table 8 has been modified to describe the sampling biases for four latitude bands. The following sentences have been added in Section 5.1:

“Table 8 also shows the model evaluation results for four latitudinal bands at 500 hPa. The observations used are shown in bold in Table 2. The differences between the two evaluations are small in the NH extratropics (30-90N) in all seasons, because of the relatively large number of observations. There are

large differences in the tropics of both hemispheres: the ozonesonde network reveals a large negative sampling bias in the model evaluation in the NH tropics (Eq-30N) in SON (-9 % in the complete sampling and -16 % in the ozonesonde sampling) and in the SH tropics (30S-Eq) in MAM (-14 % and -21 %) and a large positive sampling bias in the NH tropics in JJA (-7 % and -3 %). Large sampling biases (> 60 %) also exist in the SH extratropics (90-30S) in DJF and MAM due to the sparse ozonesonde network.”

*Section 5 “Impact of Sampling on model evaluation” discusses the regional biases and the general problem in a lot of detail but sections 4.2 and 4.3 discuss already the sampling biases for the latitude bands. I recommend moving the introduction of the sampling biases to an earlier section (2).*

The introduction and methodology of the sampling biases have been moved to Section 2.4 (Section title: Ozonesonde sampling bias estimation).

*The discussions section, in particular 6.3, does not discuss the direct results of the paper but gives an outlook on other potential aspect of the usefulness of the evaluation with chemical re-analyses. However, the positive impact on species not directly assimilated has not be demonstrated in the paper. Also, the four year comparison is not long enough to infer trends and longer re-analysis of atmospheric composition are likely to suffer from temporal artefacts because of the changing observational system. I would therefore not discuss in detail these aspects in the paper as there is not enough evidence given to support them.*

Because this is the first study to use chemical reanalysis for model evaluation, it is worthwhile discussing its possible application in future studies. The positive impacts on non-assimilated species have been discussed in our previous studies, and this is described in the revised manuscript as follows:

“Miyazaki et al. (2012b, 2015) demonstrated that the multiple-species assimilation results in a strong influence on both assimilated and non-assimilated species.”

The limitation of the evaluations using the five-year (2005-2009) reanalysis is discussed as follows in Section 5.1 of the revised manuscript:

“The five-year reanalysis (2005-2009) may cause biases in the estimated model errors in the evaluation of the 2000 decade ACCMIP simulations that used decadal-averaged SST boundary conditions and biomass-burning emissions averaged over 1997--2006 (Lamarque et al., 2010). It may neglect the influences of interannual and decadal changes in both anthropogenic and biomass emissions and meteorology. Longer-term reanalysis and time-consistent validation are required to obtain more robust

error estimations.

To discuss remaining issues with a longer-term reanalysis, the following sentences have been added in Section 6.3:

“However, any discontinuities in the availability and coverage of the assimilated measurement will affect the quality of the reanalysis and estimated interannual variability, which limit the usability of a long term reanalysis for model evaluation, as discussed in Miyazaki et al (2015) for chemical reanalyses and in Thorne and Vose (2010) for climate reanalyses. This also requires a bias-correction procedure for each assimilated measurement, in order to improve the reanalysis quality (Inness et al, 2013).”

*The used ozone sondes observations need to be clearer identified and their sampling discussed. A table of the used ozone sondes, their sampling frequency and outage in the period and mean should be summarised in a table not only for the regional areas but also for the latitude bands. It should be made clear which stations are used for global/hemispheric stratification in Figures 1 to 7 and the more regional stratification Figure 9-10.*

Table 2 has been added.

*Specific remarks,*

*PL1: 5 Please “the” before instrument names*

Added.

*PIL5: Please add a sentence on the advantages of using a 3D re-analysis rather than ozone sondes for the model evaluation.*

The following sentence has been added:

“The reanalysis provides comprehensive information on the weakness of the models, whereas we consider that the spatial and temporal coverage of individual measurements, such as ozonesonde measurements, is insufficient to capture the temporally and spatially representative model bias.”

*PIL6: Please ad here or at L 12 the problem of the ozone sampling biases*

*PIL12: Please state more clearly the differences in the evaluation results when using the re-analysis as complete field and on the the ozone sonde observation locations and times only.*

The following sentence has been added:

“The ozonesonde sampling bias in the evaluated model bias for the seasonal mean concentration is 40-50 % over the Western Pacific and East India and reaches 110 % over the equatorial Americas in the middle troposphere.”

*P1L24: better “transport”*

Replaced.

*P2L8: Please add some references for these evaluation studies*

Added.

*P2L13: there is a “First” and a “Third” (L19) but I did not find a “Second”*

Corrected.

*P2L18: The sentence starting with “However, . . .” is a strong motivation for the paper. Please elaborate and also mention that the climatologies do not capture the temporal variability of the observed ozone.*

The sentences have been rewritten as follows:

“However, the climatological data does not provide information on the temporal variability of the observed ozone. In addition, the current ozonesonde network does not cover the entire globe and is not homogeneously distributed between the hemispheres, ocean and land, and urban and rural areas, and its sampling interval is typically a week or longer. Model errors are also expected to vary greatly in time and space at various scales.”

*P2L30: Please consider citing overview papers such as Bocquet et al. (ACP 2015) or Sandu et al. (Atmosphere, 2011)*

Added.

*P4L4: Please comment how this is related to resolution of the evaluated ACCMIP models.*

The following sentence has been added:

“The horizontal model resolution is comparable to the resolution of ACCMIP models (ranging from 1.24° to 5°).”

*P4 L22: Please explain how the ensemble is constructed, i.e. what parameters are varied to get a different ensemble members in the EnKF. This information is important because you later use the ensemble spread partially as indicator of the analysis error.*

The following sentence has been added:

“The ensemble perturbations were introduced to all the state vector variables as described below.”

*P4 L23: “satellite retrieval operator”? This implies radiances i.e. Level 1 were assimilated, which is perhaps not the case. Please clarify.*

The sentence has been rewritten as:

“and an operator that converts the model fields into retrieval space”

*P5L4: Please mention if it could be shown that the modulation of the lifetimes was an improvement.*

The following sentence has been added:

“Miyazaki et al. (2015) demonstrated that the Northern/Southern Hemisphere OH ratio became closer to an observational estimate of Patra et al (2014) due to the multiple-species assimilation.”

*P5 L14: Please provide a table with the assimilated retrievals and additional information such as assimilated height range, temporal data coverage and an indication of observation errors statistics.*

Table 1 has been added.

*P5L21: Please elaborate on the period and the meteorological input for this time-slice setup. It is important to know what sort of realism can be expected from the simulation if they are compared against observations.*

The following sentences have been added:

“The number of years that the ACCMIP models simulated for the 2000 decadal simulation mostly varied between 4 and 12 years for each model. Each model simulation was averaged over the simulated years.”

“Meteorological fields were obtained from analyses in CICERO-OsloCTM2 and from climate model fields in MOCAGE. UM-CAM and STOC-HadAM3 simulated meteorological and chemical fields, but chemistry did not affect climate. In all other models, simulated chemical fields were used in the radiation calculations and hence provide a forcing effect on the general circulation of the atmosphere. Lamarque et al. (2013) indicated that most models overestimate global annual precipitation and have a cold bias in the lower troposphere.”

*P6L9: Please clarify which station were used for the comparison. The ones listed in table 4 ? If so mention it here. Provide information about station numbers and individual temporal coverage as this may vary greatly and contribute to the ozone sonde sampling bias.*

The sentences have been rewritten as:

“All available data from the WOUDC database are used for the evaluation of reanalysis data (Section 3), as listed in Table 2. For the evaluation of ACCMIP models and ozonesonde sampling biases (Section 4 and 5), we use the ozonesonde sampling based on the compilation by Tilmes et al. (2012), which is shown in bold in Table 2. Because there is no observation after 2003 in Scoresbysund, this location has been removed from the compilation in this study.”

Table 2 has been added to summarize the ozonesonde measurements.

*P6 L17-23: This description of the model changes may better put in the model description section.*

Moved.

*P6L30: Please clarify what the differences in the assimilated observations are between this data set and the previous one.*

The following sentence has been added:

“MLS retrievals have been updated from v3.3 in Miyazaki et al. (2015) to v4.2 in this study.”

*P7L10: Please clarify what temporal averaging the temporal correlation is based on (i.e. monthly means, annual means, instantaneous values etc.). It is good practise to de-seasonalize the time series to get a more meaningful information about the temporal correlation. On the other hand, 5 years might be too short to obtain a robust information about seasonality and year-to-year variability.*

The sentence has been rewritten as follow:

“The tropospheric concentrations show distinct seasonal and year-to-year variations, for which the temporal correlation based on the monthly and regional mean concentrations is increased by the data assimilation globally, except at high latitudes in the lower troposphere.”

Because the seasonal pattern varies with year especially in the tropics, we did not apply de-seasonalization.

The limitations of the five-year reanalysis data are discussed in the revised manuscript as follow:

“The reanalysis can be extended to a longer-term validation that will provide more information on seasonality and year-to-year variability.”

*The numbers in figure 1 indicate a very good reduction in biases but far less so for variability measures. (The reduction in RMSE seems dominated by the bias component and temporal correlation is less improved). This seems to contradict the theoretical basis of data assimilation, which is meant to reduce the error variance assuming bias free model. A further discussion would be helpful.*

We confirmed that both the bias and RMSE are largely reduced compared with assimilated measurements (e.g., TES) due to data assimilation, as demonstrated in our previous study (Miyazaki et al., 2015). In the comparison against independent ozonesonde measurements in this study, spatial gaps between the model/analysis and observations (i.e., representativeness error) result in large RMSE even after data assimilation.

The relevant sentence has been rewritten as follows:

“Root-Mean-Square-Errors (RMSEs) are also reduced above the middle troposphere, although the reduction rate is relatively small compared to the bias, probably due to representativeness errors between the ozonesonde measurements and data assimilation analysis.”

*P7L14: As you also show the ozone sondes in the sections on seasonal variation and hemispheric gradient, it seems odd not to show the ozone sondes observations in Figure 3. Please add a further panel with colour dots at the station location.*

Added.

*P7L18: It is confusing that you choose a different latitude bands for table 1 and table 2. Please use the*



*same selection of latitude bands through the paper.*

Corrected.

*P7L18: Please, clarify how spatial  $r$  was calculated (only using the 5 year mean, based on lat-long grid points or area-weighted grid-points etc. Consider filtering small scale noise by averaging over areas corresponding to the resolution of the reanalysis.*

The sentence has been rewritten as:

“As summarized in Table 4, the global spatial distributions are similar between the five-year mean reanalysis field and the ensemble mean when estimated at  $2^{\circ}\times 2.5^{\circ}$  spatial resolution, with a spatial correlation ( $r$ ) greater than...”.

In addition, the following sentence has been added in Section 2.2:

“Both the ACCMIP models and chemical reanalysis are interpolated to at  $2^{\circ}\times 2.5^{\circ}$  spatial resolution and 67 levels, following Bowman et al. (2013), and then compared each other. Spatial correlations are computed with consideration of weighting for the latitude.”

*The spatial correlation coefficient presented here seems less suited to express agreement in spatial patterns, which would be meaningful for the understanding of the model performance. Spatial  $r$  might be too much effected by the underlying spatial variability of the actual fields, thereby penalizing fields with greater more random variability i.e. standard deviation.*

Because all model and reanalysis fields were interpolated into the same spatial resolution ( $2^{\circ}\times 2.5^{\circ}$ ) before the comparisons, the estimated spatial correlation can provide information on the model performance on the spatial pattern at that spatial scale. Although more thorough evaluations would be required for more careful discussions of the spatial pattern, the present evaluation method has been widely used and is valid.

*P7L19: The lower spatial correlation coefficient at  $p=500$  hPa in NH could simply be caused by a different transport patterns (winds) and larger heterogeneity than in SH. Good correlation at the surface could be simply because a good match of emission patterns. High correlation at 200hPa in extra-tropics could mean that the transition in to the stratosphere agreed reasonably well. So are the different spatial  $r$  really helpful to distinguish model performance?*

The different reasons for each region raised by the reviewer are discussed in the manuscript. Because the spatial correlation varies significantly among the models as discussed in Section 4.1, it is a useful diagnostic of model performance. Please also see our reply above.

*P8L4: Please clarify again how the statistical variables shown in the Taylor diagram were computed. Given my scepticism about the meaning of the spatial correlation, I would consider omitting Figure 4 and shortening the discussion.*

The following sentence has been added in Section 2.2:

“Both the ACCMIP models and chemical reanalysis are interpolated to at  $2^{\circ}\times 2.5^{\circ}$  spatial resolution and 67 levels, following Bowman et al. (2013), and then compared each other. Spatial correlations are computed with consideration of weighting for the latitude.”

We think the Taylor diagram plots are useful to measure the general performance of each model and are widely used in the climate model evaluation. Please also see our reply on the spatial correlation estimates above.

*P9L6: Please clarify how the seasonal amplitude was calculated. How was made sure that “noise”, i.e. unstructured variability, was not attributed to the seasonal amplitude.*

The seasonal amplitude was estimated from the difference between maximum and minimum monthly mean concentrations, which could reflect noise in the seasonal variation. This is described in the revised manuscript.

*P9L12: In section5 you discuss the sampling bias with respect to the regional areas. You should also discuss the sampling biases w.r.t to the selected latitude bands. This is needed because you also discuss model performance for the latitude bands. As mentioned in the general remarks, please also indicate the difference between the model results sampled at ozone locations and observation times and the area averages.*

Please see our reply above.

*P9L13: Please confirm that the average is area weighted and not based simply on lat-long grid boxes, which decrease in size towards the poles.*

The average is area weighted, as described in the revised manuscript.

*P10L8: Please clarify how you exactly calculate the hemispheric gradient both for the gridded fields and for the ozone sonde observations.*

The following sentence has been added:

“For the estimation of the gradient using the ozonesonde observations, we made a gridded dataset from the ozonesonde observations based on the completion by Tilmes et al (2012) at 2°x2.5° spatial resolution, and then calculated area-weighted hemispheric mean concentrations using the gridded data.”

*P10L15: add missing “At” before “Around ”*

Added.

*P10L18: How do these value compare to values from the literature?*

To the best of our knowledge, there is no literature that shows an inter-hemispheric ozone gradient for different altitudes of the troposphere.

*P10L26: As you already discuss sampling biases it a bit inconsistent to put the section at this place. This very good introduction to sampling biases (p10L27 – p11L15) should come earlier in the paper, i.e. in the part when you discuss the methods (section2)*

Moved to Section 2.4.

*P10L15: The sampling biases depends on the averaging area and the selection of ozone sondes. The sampling biases estimated by using your re-analysis should be presented for the Tilmes regions as well as for the latitude bands (choose one set only) in and uniform way. As model results are often evaluated for the latitude bands, this information would be very interesting for the scientific community.*

Table 8 has been modified to include the results for four latitudinal bands.

*P10L24 Please add also the stations used for the latitude bands averages in table 3.*

This is mentioned in Section 2.3 and Table 2 in the revised manuscript.

*P12L1: I think there is would be very good to compute the sampling biases also directly for the re-analysis i.e. the difference between the re-analysis sampled as ozone and as area-time averages. This information would be in my opinion of more general meaning than the values for the ACCMIP error.*

Table 7 has been added to discuss the sampling bias for the reanalysis fields. The following discussion, regarding this table, has been added in Section 5:

“Table 7 demonstrates the regional and seasonal mean differences of the reanalysis concentrations between the complete sampling and the ozonesonde sampling. The ozonesonde sampling results have higher concentrations (by about 3 %) in the two NH polar regions for most cases, whereas the difference is smaller in NH polar west than in NH polar east. Among the NH mid-latitude regions, a large difference (about 14 %) exists between the two cases over the eastern United States in June-August (JJA), where the comparison using monthly reanalysis fields sampled at the ozonesonde locations (brackets in Table 7) suggests that the sampling bias is dominated by temporal variations. The tropical and subtropical regions exhibit large sampling biases, 4-12.3 % over the NH subtropics, -3.2-5.0 % over the Western Pacific and East Indian Ocean, 0--7.8 % over the equatorial Americas, and -3.8-7.5 % over the Atlantic Ocean and Africa. In most of the tropical and subtropics regions, both the spatial and temporal sampling biases are important, because of large spatial and temporal variability of ozone and the sparse observation network. For the global tropics, the sampling bias reaches 13 % in the NH (Eq-30N) and 8 % in the SH (30S-Eq). Thus, the ozonesonde network has a major limitation when it comes to capturing ozone concentrations that are representative of seasonal and regional means for the entire tropical region. The sampling bias may not be negligible even in the SH (0.3-3.9 % in the SH mid-latitudes and 0.8-4.2 % in the SH high latitudes), and it is large (up to 13 %) when estimations are done for a large area (90-30S). The large sampling bias in 90-30S is primarily attributed to spatial variability. The impact of the sampling bias on the model evaluation is discussed in the following section.”

*P12L1: Why does table 5 show the median whereas otherwise only the ensemble mean is discussed or shown. (Using only the median would be perhaps a better option overall)*

We present mean values in other estimates because we also discuss the standard deviation to the mean. Medians are shown only in this table (Table 8 in the revised manuscript), in order to provide more robust estimates of the model error and sampling bias for each region. The following sentence has been added to clarify this point:

“The sampling bias is evaluated using the median of the multiple models to provide robust estimates of the model performance.”

*P13L8: The ozone network in SH high-latitudes is actually quite high because of the need to monitor the ozone hole. The launch frequency varies for some stations a lot because more sondes are launched during the ozone hole season.*

Yes, I agree. However, because only three stations were considered in the comparison following Tilmes et al. (2012), the ozonesonde network is not sufficient to capture the ozone variations. Our results suggest that the temporal sampling bias mainly causes the sampling bias in the SH high latitudes in MAM and JJA. This is discussed in the revised manuscript.

*P13L24: Please add also the sampling biases for the latitude bands.*

Added in Table 10. The following sentences have been added to discuss the results:

“Because the seasonal variations differ among different regions, the seasonal amplitude estimated for the entire NH extratropics (30-90N) is largely different between the two estimates throughout the troposphere.”

“The sampling bias in the seasonal amplitude estimated for the entire tropics is larger than 60 % throughout the troposphere both in the NH (Eq-30N) and SH (30S-Eq).”

*P14 L14: Please clarify how much of the analysis ensemble spread depends on some-times arbitrary choices to cause spread between the ensemble members.*

The following sentence has been added:

“Note that the data assimilation setting influences the analysis uncertainty estimation in the reanalysis. In particular, the analysis spread was found to be sensitive to the choice of ensemble size (Miyazaki et al., 2012b). A large ensemble size is essential to capture the proper background error covariance structure (i.e., analysis uncertainty).”

*P14L15: Please clarify to what extent the analysis uncertainty is controlled by the uncertainty of the assimilated observations.*

The sentences have been rewritten as follows:

“Miyazaki et al (2015) investigated that the analysis spread is caused by errors in the model input data, model processes, and assimilated measurements, and it is reduced if the analysis converges to a true state. The analysis spread is smaller in the extratropical lower stratosphere than in the tropical upper

troposphere at 200 hPa, because of the high accuracy of the MLS measurements. In contrast, in the middle troposphere, the analysis spread is generally smaller in the tropics than the extratropics because of the higher sensitivities in the TES retrievals.”

*P14L21: How does the ensemble spread relate to the spread of the ensemble in the EnKF. Could the ACCMIP ensemble spread be used to verify the EnKF ensemble spread?*

The simultaneous enhancement of the analysis uncertainty and the model spread indicates low robustness of the validation results, as discussed in the manuscript. Verification of EnKF ensemble spread using ACCMIP ensemble model spread would be an interesting research topic but requires careful discussion and is clearly out of the scope of the present study.

*P15L3: Please see my general comment on this chapter. Improvement on species not directly assimilated needs to be demonstrated. Long-term reanalysis could suffer from artificial jumps because of the change in the observing system (for example degradation of TES after 2010).*

Corrections have been made. Please see our reply above.

*P15L29: I don't understand this conclusion at all. Re-analysis are only valid for present day conditions when observations are available. They cannot be used to for pre- industrial estimates nor the differences with today's values.*

Assuming that the persistent systematic bias from the pre-industrial to present day can be attributed to time-independent model errors in chemical and transport processes, as suggested by previous studies (e.g., Young et al., 2013), the validation results using the reanalysis for the present day has the potential to evaluate preindustrial to present-day ozone radiative forcing. This is discussed in the manuscript.

*P16L4: Please mention that you (only) consider ozone sondes as reference in this paper.*

The following sentence has been added:

“The evaluation results are also used to quantify the ozonesonde network sampling bias.”

*P16L6: Please mention the advantage of using a re-analysis, i.e. a gridded field. Please mention that the biases of the re-analysis against ozone sondes are small.*

The sentences have rewritten as follows:

“The reanalysis product provides comprehensive and unique information on global ozone distributions for the entire troposphere and on the weakness of the individual models and multi-model mean. Validation of the chemical reanalysis using global ozonesondes shows good agreement throughout the free troposphere and lower stratosphere for both seasonal and year-to-year variations.”

*P16L17: Please add a statement if these finding are consistent with other evaluation studies, i.e. the Young et al. paper.*

The following sentence has been added:

“The performance of the ACCMIP model when compared with the reanalysis is qualitatively similar for most cases from that shown by Young et al. (2013) using the ozonesonde measurements but quantitatively different because of the ozonesonde network sampling bias.”

*P16L20-30: Please give some numbers for the sampling biases. Also include the sampling bias w.r.t to latitude bands.*

The following sentences have been added:

“For the global tropics, the ozonesonde sampling bias is largely negative by 80 % in the NH (Eq-30N) in SON and by 50 % in the SH (30S-Eq) in MAM.”

“Large sampling biases (> 60 %) exist in the SH extratropics (90-30S) in DJF and MAM”

*p17L4: Please add a statement that it will be a challenge to combine all these observations in a consistent way in a more long term re-analysis.*

The following sentence has been added:

“Combining many observations requires a bias correction procedure for each assimilated measurement to improve the reanalysis quality but needs to be carefully checked.”
